# Supplementary material for: Comparative genomics of the black rot pathogen Xanthomonas campestris pv. campestris and non-pathogenic co-inhabitant Xanthomonas melonis from Trinidad reveal unique pathogenicity determinants and secretion system profiles
Source: PeerJ. 2022 Jan 3;10:e12632. doi: 10.7717/peerj.12632 (PMC8734464; doi:10.7717/peerj.12632)
Supplement: Supplemental Information 1 [file peerj-10-12632-s001.xlsx]

## Sheet: A1
Supplemental Table 1. General WGS assembly metrics of native Xanthomonas isolates.
Isolate	Species	Source location	GTDB-TK	MIGA	Genome completeness (BUSCO%)	Total reads	% mapped reads (properly paired reads)	Total contigs	Total contigs (>1000bp)	Largest contig (bp)	Predicted Plasmid contigs	PLSDB hits (Top plasmid containing genera matching to predicted plasmids)
Ar1BCA1	Xcc	Aranguez	98% GCF_000007145.1 X. cc ATCC 33913	99% X. cc	99.8	9117635	99.86 (98.56)	164	77	424927	10	Xanthomonas, Azospirillum, Paracoccus
Ar1PC2	Xcc	Aranguez	98% GCF_000007145.1 X. cc ATCC 33913	99% X. cc	99.8	12802828	99.82 (98.47)	257	71	897897	74	Xanthomonas, Pseudomonas, Streptomyces
BrA1	Xcc	Aranguez	98% GCF_000007145.1 X. cc ATCC 33913	99% X. cc	99.8	21141548	99.83 (98.45)	202	90	458090	21	Xanthomonas, Azospirillum, Paracoccus
CaNP1C	Xcc	Navet	98% GCF_000007145.1 X. cc ATCC 33913	99% X. cc	99.7	8536813	99.3 (98.96)	162	59	331279	4	Xanthomonas, Pseudomonas, Paracoccus
Cf3C	Xcc	Aranguez	98% GCF_000007145.1 X. cc ATCC 33913	99% X. cc	99.8	10177429	99.94 (98.07)	215	93	424950	27	Xanthomonas, Azospirillum, Paracoccus
Cf4B1	Xcc	Aranguez	98% GCF_000007145.1 X. cc ATCC 33913	99% X. cc	99.7	10914825	99.91 (98.61)	176	85	424789	20	Xanthomonas, Azospirillum, Paracoccus
CaNP1D	Xmel	Navet	98% GCF_002940015.1 X. melonis CFBP4644	Xanthomonas sp	99.8	18391193	99.88 (98.51)	220	73	513871	6	Xanthomonas, Rhizobium, Streptomyces
CaNP5B	Xmel	Navet	98% GCF_002940015.1 X. melonis CFBP4644	Xanthomonas sp	99.7	8911894	99.9 (98.42)	245	76	425429	14	Xanthomonas, Rhizobium, Streptomyces
CaNP6A	Xmel	Navet	98% GCF_002940015.1 X. melonis CFBP4644	Xanthomonas sp	99.8	10784050	99.91 (97.79)	253	76	425792	14	Xanthomonas, Rhizobium, Streptomyces
DMCX	Xmel	DMCX	98% GCF_002940015.1 X. melonis CFBP4644	Xanthomonas sp	99.7	12360477	99.95 (98.39)	107	44	660778	9	Xanthomonas, Escherichia, Rhizobium

## Sheet: A2
Supplemental Table 2. Detected rps and rpl allelic profiles of native Xcc and Xmel strains
Strain	Species	BACT000001 (rpsA)	BACT000002 (rpsB)	BACT000003 (rpsC)	BACT000004 (rpsD)	BACT000005 (rpsE)	BACT000006 (rpsF)	BACT000007 (rpsG)	BACT000008 (rpsH)	BACT000009 (rpsI)	BACT000010 (rpsJ)	BACT000011 (rpsK)	BACT000012 (rpsL)	BACT000013 (rpsM)	BACT000014 (rpsN)	BACT000015 (rpsO)	BACT000016 (rpsP)	BACT000017 (rpsQ)	BACT000018 (rpsR)	BACT000019 (rpsS)	BACT000020 (rpsT)	BACT000021 (rpsU)	BACT000030 (rplA)	BACT000031 (rplB)	BACT000032 (rplC)	BACT000033 (rplD)	BACT000034 (rplE)	BACT000035 (rplF)	BACT000036 (rplL)	BACT000038 (rplI)	BACT000039 (rplJ)	BACT000040 (rplK)	BACT000042 (rplM)	BACT000043 (rplN)	BACT000044 (rplO)	BACT000045 (rplP)	BACT000046 (rplQ)	BACT000047 (rplR)	BACT000048 (rplS)	BACT000049 (rplT)	BACT000050 (rplU)	BACT000051 (rplV)	BACT000052 (rplW)	BACT000053 (rplX)	BACT000056 (rpmA)	BACT000057 (rpmB)	BACT000058 (rpmC)	BACT000059 (rpmD)	BACT000060 (rpmE)
Ar1BCA1	Xcc	317	272	292	259	256	19924	290	233	281	268	279	283	246	240	246	204	253	245	232	198	147	28768	330	323	305	315	437	308	24691	295	311	317	272	316	301	299	285	343	346	277	300	299	208	13169	168	147	170	183
BrA1	Xcc	317	272	292	259	256	19924	290	233	281	268	279	283	246	240	246	204	253	245	232	198	147	28768	330	323	305	315	437	308	24691	295	311	317	272	316	301	299	285	343	346	277	300	299	208	13169	168	147	170	183
CaNP1C	Xcc	317	272	292	257	256	210	5507	233	281	268	279	283	246	240	246	204	253	245	232	198	147	343	330	323	305	315	437	308	322	295	311	317	272	316	301	299	285	343	346	276	300	299	208	254	168	147	170	183
Cf3C	Xcc	317	272	292	259	256	19924	290	233	281	268	279	283	246	240	246	204	253	245	232	198	147	28768	330	323	305	315	437	308	24691	295	311	317	272	316	301	299	285	343	346	277	300	299	208	13169	168	147	170	183
Cf4B1	Xcc	317	272	292	259	256	19924	290	233	281	268	279	283	246	240	246	204	253	245	232	198	147	28768	330	323	305	315	437	308	24691	295	311	317	272	316	301	299	285	343	346	277	300	299	208	13169	168	147	170	183
Ar1PC2	Xcc	321	272	295	259	256	210	290	235	281	268	279	283	246	242	246	4672	255	245	232	198	9621	84904	330	323	305	318	437	307	322	295	314	317	272	319	301	299	285	343	346	276	298	299	208	254	168	147	170	4817
CaNP1D	Xmel	83778	75977	72942	83112	68650	59061	76952	68048	29721	25691	69018	28007	68066	65208	26897	60329	22916	59037	58206	24370	8797	34006	34148	71183	73500	70750	78150	28044	74871	62981	29357	27331	26585	70443	27208	26368	64008	69288	75091	24434	57188	59615	24798	67744	22669	19103	43533	28440
CaNP5B	Xmel	83779	75978	29078	32351	68650	59061	76952	68049	29721	25691	69019	28007	68067	65209	26897	60329	22916	59037	58207	24370	8797	84906	85694	71184	73500	70751	78151	28044	74871	62982	75156	27331	26585	70443	68573	26368	64008	69288	75091	24434	57188	23581	24798	26166	58845	19103	43533	28440
CaNP6A	Xmel	83779	75978	29078	32351	68650	59061	76952	68049	29721	25691	69019	28007	68067	65209	26897	60329	22916	59037	58207	24370	8797	84906	85694	71184	73500	70751	78151	28044	74871	62982	75156	27331	26585	70443	68573	26368	64008	69288	75091	24434	57188	23581	24798	26166	58845	19103	43533	28440
DMCX	Xmel	83779	75980	29078	83113	68651	59062	29422	68050	77271	25691	69019	28007	68067	65210	26897	60329	22916	59038	58206	24370	8797	84907	34148	71185	73500	70752	78151	28044	74871	62983	75156	27331	26585	28122	68574	65574	64009	69288	75091	24434	23499	23581	60332	67745	22669	19103	43533	28440
[truncated: 8 more columns]

## Sheet: A3
Supplemental Table 3. Common and Unique classified features and counts of each for both Xcc and Xmel isolates
Common	Xcc	Xmel	Unique	Core		Acessory
Core Genome			Species	xcc	xmel	xcc	xmel
Biofilm formation	53	64	Photosynthesis	-	8	-	-
Ribosome	54	54	Thermogenesis	-	7	-	-
Purine metabolism	51	51	Arachidonic acid metabolism	5	-	-	-
ABC transporters	48	51	Synthesis and degradation of ketone bodies	-	5	-	1
Oxidative phosphorylation	46	46	Geraniol degradation	4	-	-	-
Bacterial secretion system	45	42	NOD-like receptor signaling pathway	4	-	-	2
Flagellar assembly	38	38	Polyketide sugar unit biosynthesis	4	-	-	-
Carbon fixation pathways in prokaryotes	34	35	PPAR signaling pathway	4	-	-	-
Cysteine and methionine metabolism	33	33	RNA polymerase	4	-	-	-
Quorum sensing	31	32	Aminoacyl-tRNA biosynthesis	-	-	-	3
Glycine, serine and threonine metabolism	30	30	Ascorbate and aldarate metabolism	-	-	1	-
Pyruvate metabolism	30	29	beta-Lactam resistance	-	-	1	-
Porphyrin and chlorophyll metabolism	29	28	Betalain biosynthesis	-	-	-	1
Amino sugar and nucleotide sugar metabolism	28	24	Biotin metabolism	-	-	1	-
Pyrimidine metabolism	25	25	Butanoate metabolism	-	-	-	1
Folate biosynthesis	25	24	Caprolactam degradation	-	-	1	-
Glycolysis / Gluconeogenesis	24	24	Cholesterol metabolism	-	-	1	-
Starch and sucrose metabolism	24	24	Degradation of aromatic compounds	-	-	1	-
Aminoacyl-tRNA biosynthesis	24	23	DNA replication	-	-	2	-
Glyoxylate and dicarboxylate metabolism	23	24	Fatty acid biosynthesis	-	-	1	-
Butanoate metabolism	23	22	Fatty acid metabolism	-	-	1	-
Phenylalanine, tyrosine and tryptophan biosynthesis	23	22	Flagellar assembly	-	-	-	2
Homologous recombination	22	22	Folate biosynthesis	-	-	1	-
Pentose phosphate pathway	22	22	Fructose and mannose metabolism	-	-	3	-
Arginine and proline metabolism	22	21	Galactose metabolism	-	-	1	-
2-Oxocarboxylic acid metabolism	21	21	Homologous recombination	-	-	1	-
Fatty acid metabolism	21	21	Mineral absorption	-	-	1	-
Alanine, aspartate and glutamate metabolism	20	21	Nucleotide excision repair	-	-	1	-
Propanoate metabolism	20	21	Oxidative phosphorylation	-	-	-	1
Valine, leucine and isoleucine degradation	20	21	Penicillin and cephalosporin biosynthesis	-	-	2	-
Citrate cycle (TCA cycle)	20	19	Pentose and glucuronate interconversions	-	-	3	-
Fructose and mannose metabolism	20	18	Pentose phosphate pathway	-	-	1	-
Peptidoglycan biosynthesis	19	18	Peptidoglycan biosynthesis	-	-	-	1
Sulfur metabolism	17	19	Porphyrin and chlorophyll metabolism	-	-	-	1
Glycerophospholipid metabolism	19	16	Propanoate metabolism	-	-	1	-
Lipopolysaccharide biosynthesis	17	18	Protein export	-	-	1	-
Methane metabolism	18	17	Ubiquinone and other terpenoid-quinone biosynthesis	-	-	-	1
Mismatch repair	17	17	Vitamin B6 metabolism	-	-	1	-
Benzoate degradation	16	16
RNA degradation	16	16
Pantothenate and CoA biosynthesis	16	15
Protein export	15	16
Base excision repair	16	14
DNA replication	15	15
Histidine metabolism	15	15
Nicotinate and nicotinamide metabolism	14	16
Bacterial chemotaxis	15	14
Lysine biosynthesis	14	14
Pentose and glucuronate interconversions	14	14
Tryptophan metabolism	14	14
Galactose metabolism	14	13
O-Antigen nucleotide sugar biosynthesis	15	12
Fatty acid biosynthesis	13	13
Glutathione metabolism	13	13
One carbon pool by folate	13	13
beta-Lactam resistance	12	12
Valine, leucine and isoleucine biosynthesis	12	12
Degradation of aromatic compounds	12	11
Terpenoid backbone biosynthesis	11	12
Ubiquinone and other terpenoid-quinone biosynthesis	11	12
Arginine biosynthesis	11	11
Biotin metabolism	11	11
Nitrogen metabolism	11	11
Tyrosine metabolism	11	11
Cell cycle	11	10
Ascorbate and aldarate metabolism	10	10
Phenylalanine metabolism	10	10
Riboflavin metabolism	10	9
Drug metabolism - other enzymes	9	9
Fatty acid degradation	9	9
Selenocompound metabolism	9	9
Thiamine metabolism	9	9
C5-Branched dibasic acid metabolism	8	8
Nucleotide excision repair	8	8
Sulfur relay system	8	8
Monobactam biosynthesis	7	8
Glycerolipid metabolism	7	7
Lysine degradation	7	7
Peroxisome	7	7
Streptomycin biosynthesis	7	7
Vancomycin resistance	7	7
Other glycan degradation	7	6
Plant-pathogen interaction	7	6
Vitamin B6 metabolism	6	7
beta-Alanine metabolism	6	6
Styrene degradation	6	6
Inositol phosphate metabolism	6	5
Lysosome	6	5
Antifolate resistance	5	5
Biosynthesis of unsaturated fatty acids	5	5
Cyanoamino acid metabolism	4	5
Acessory Genome
ABC transporters	3	5
Amino sugar and nucleotide sugar metabolism	2	1
Bacterial chemotaxis	1	2
Bacterial secretion system	4	5
Biofilm formation	3	1
Cell cycle	1	1
Cysteine and methionine metabolism	1	1
Mismatch repair	2	1
Nicotinate and nicotinamide metabolism	1	1
O-Antigen nucleotide sugar biosynthesis	2	1
Pantothenate and CoA biosynthesis	1	1
Plant-pathogen interaction	1	3
Quorum sensing	8	1
Valine, leucine and isoleucine degradation	1	1

## Sheet: A4
Supplemental Table 4A. Predicted plasmid derived contigs and related plasmid refernece sequences							Supplemental Table 4B. Cumulative length of predicted plasmid derived contigs and the most probable source plasmid
Species	Strain	contig	pident	alignment	Reference Sequence			Native Xcc (kb)						Native Xmel (kb)
Xcc	Ar1PC2	contig00037	99.915	7082	NZ_CP017320.1 Xanthomonas campestris pv. campestris str. CN18 plasmid unnamed2		Reference Plasmid	Ar1BCA1	Ar1PC2	BrA1	CaNP1C	Cf3C	Cf4B1	DMCX	CaNP5B	CaNP6A
Xcc	BrA1	contig00031	99.351	26308	NZ_CP018463.1 Xanthomonas euvesicatoria strain LMG930 plasmid pLMG930.2, complete sequence		NC_007507.1 Xanthomonas campestris pv. vesicatoria str. 85-10 plasmid pXCV183, complete sequence						13
Xmel	CaNP5B	contig00019	99.949	40854	NZ_CP018472.1 Xanthomonas perforans strain LH3 plasmid pLH3.1, complete sequence		NZ_CP017320.1 Xanthomonas campestris pv. campestris str. CN18 plasmid unnamed2	11.7	7.1				11.7
Xmel	CaNP6A	contig00020	99.949	40854	NZ_CP018472.1 Xanthomonas perforans strain LH3 plasmid pLH3.1, complete sequence		NZ_CP018463.1 Xanthomonas euvesicatoria strain LMG930 plasmid pLMG930.2, complete sequence	7.6	10.3	82	5.2	77.8	82
Xcc	Cf3C	contig00045	99.347	26308	NZ_CP018463.1 Xanthomonas euvesicatoria strain LMG930 plasmid pLMG930.2, complete sequence		NZ_CP018472.1 Xanthomonas perforans strain LH3 plasmid pLH3.1, complete sequence			13.7		11.1	8	18.4	40.8	40.8
Xcc	Cf4B1	contig00042	99.347	26308	NZ_CP018463.1 Xanthomonas euvesicatoria strain LMG930 plasmid pLMG930.2, complete sequence		NZ_LN811400.1 Xanthomonas campestris pv. campestris isolate B-1459 plasmid I, complete sequence		12.6
Xcc	Cf4B1	contig00056	93.824	12990	NC_007507.1 Xanthomonas campestris pv. vesicatoria str. 85-10 plasmid pXCV183, complete sequence
Xmel	DMCX	contig00026	99.94	18368	NZ_CP018472.1 Xanthomonas perforans strain LH3 plasmid pLH3.1, complete sequence
Xcc	Ar1BCA1	contig00057	93.82	4125	NZ_CP018463.1 Xanthomonas euvesicatoria strain LMG930 plasmid pLMG930.2, complete sequence
Xcc	Ar1BCA1	contig00060	99.799	3478	NZ_CP018463.1 Xanthomonas euvesicatoria strain LMG930 plasmid pLMG930.2, complete sequence
Xcc	Ar1BCA1	contig00061	99.711	2077	NC_007507.1 Xanthomonas campestris pv. vesicatoria str. 85-10 plasmid pXCV183, complete sequence
Xcc	Ar1BCA1	contig00066	99.893	937	NC_007507.1 Xanthomonas campestris pv. vesicatoria str. 85-10 plasmid pXCV183, complete sequence
Xcc	Ar1PC2	contig00065	87.948	1748	NZ_CP018463.1 Xanthomonas euvesicatoria strain LMG930 plasmid pLMG930.2, complete sequence
Xcc	Ar1PC2	contig00069	88.253	1359	NZ_CP018463.1 Xanthomonas euvesicatoria strain LMG930 plasmid pLMG930.2, complete sequence
Xcc	CaNP1C	contig00040	93.084	5232	NZ_CP018463.1 Xanthomonas euvesicatoria strain LMG930 plasmid pLMG930.2, complete sequence
Xcc	Cf3C	contig00076	92.581	3097	NZ_CP018472.1 Xanthomonas perforans strain LH3 plasmid pLH3.1, complete sequence
Xcc	Ar1PC2	contig00042	96.69	4811	NZ_CP017325.1 Xanthomonas campestris pv. campestris str. CN15 plasmid unnamed1, complete sequence
Xcc	Ar1PC2	contig00048	93.587	2796	NZ_LR828259.1 Xanthomonas hortorum pv. vitians strain CFBP 498 plasmid CFBP498_p47, complete sequence
Xcc	BrA1	contig00079	100	1088	NC_007504.1 Xanthomonas campestris pv. vesicatoria str. 85-10 plasmid pXCV2, complete sequence
Xcc	Cf3C	contig00077	97.861	2892	AP019683.1 Xanthomonas campestris pv. campestris MAFF106712 pXcc1 plasmid DNA, complete genome
Xcc	BrA1	contig00062	95.793	1445	NZ_CP017320.1 Xanthomonas campestris pv. campestris str. CN18 plasmid unnamed2
Xcc	Ar1BCA1	contig00031	80.733	4001	NZ_CP018472.1 Xanthomonas perforans strain LH3 plasmid pLH3.1, complete sequence
Xcc	Ar1BCA1	contig00034	99.829	11711	NZ_CP017320.1 Xanthomonas campestris pv. campestris str. CN18 plasmid unnamed2
Xcc	Ar1PC2	contig00021	98.662	7173	NZ_CP018463.1 Xanthomonas euvesicatoria strain LMG930 plasmid pLMG930.2, complete sequence
Xcc	Ar1PC2	contig00039	99.801	3011	NC_007507.1 Xanthomonas campestris pv. vesicatoria str. 85-10 plasmid pXCV183, complete sequence
Xcc	BrA1	contig00022	99.892	32273	NZ_CP018463.1 Xanthomonas euvesicatoria strain LMG930 plasmid pLMG930.2, complete sequence
Xcc	BrA1	contig00027	80.733	4001	NZ_CP018472.1 Xanthomonas perforans strain LH3 plasmid pLH3.1, complete sequence
Xcc	BrA1	contig00032	95.145	19193	NZ_CP018463.1 Xanthomonas euvesicatoria strain LMG930 plasmid pLMG930.2, complete sequence
Xcc	BrA1	contig00037	95.421	5739	NZ_CP018472.1 Xanthomonas perforans strain LH3 plasmid pLH3.1, complete sequence
Xcc	BrA1	contig00051	78.483	3988	NZ_CP018472.1 Xanthomonas perforans strain LH3 plasmid pLH3.1, complete sequence
Xcc	BrA1	contig00053	92.745	4180	NZ_CP018463.1 Xanthomonas euvesicatoria strain LMG930 plasmid pLMG930.2, complete sequence
Xcc	CaNP1C	contig00038	99.768	3011	NC_007507.1 Xanthomonas campestris pv. vesicatoria str. 85-10 plasmid pXCV183, complete sequence
Xcc	Cf3C	contig00024	99.892	32273	NZ_CP018463.1 Xanthomonas euvesicatoria strain LMG930 plasmid pLMG930.2, complete sequence
Xcc	Cf3C	contig00028	95.145	19193	NZ_CP018463.1 Xanthomonas euvesicatoria strain LMG930 plasmid pLMG930.2, complete sequence
Xcc	Cf3C	contig00035	80.733	4001	NZ_CP018472.1 Xanthomonas perforans strain LH3 plasmid pLH3.1, complete sequence
Xcc	Cf3C	contig00056	78.483	3988	NZ_CP018472.1 Xanthomonas perforans strain LH3 plasmid pLH3.1, complete sequence
Xcc	Cf4B1	contig00025	95.145	19193	NZ_CP018463.1 Xanthomonas euvesicatoria strain LMG930 plasmid pLMG930.2, complete sequence
Xcc	Cf4B1	contig00028	99.892	32273	NZ_CP018463.1 Xanthomonas euvesicatoria strain LMG930 plasmid pLMG930.2, complete sequence
Xcc	Cf4B1	contig00034	80.733	4001	NZ_CP018472.1 Xanthomonas perforans strain LH3 plasmid pLH3.1, complete sequence
Xcc	Cf4B1	contig00037	99.829	11711	NZ_CP017320.1 Xanthomonas campestris pv. campestris str. CN18 plasmid unnamed2
Xcc	Cf4B1	contig00052	78.483	3988	NZ_CP018472.1 Xanthomonas perforans strain LH3 plasmid pLH3.1, complete sequence
Xcc	Cf4B1	contig00053	92.745	4180	NZ_CP018463.1 Xanthomonas euvesicatoria strain LMG930 plasmid pLMG930.2, complete sequence
Xcc	Ar1PC2	contig00020	97.979	12636	NZ_LN811400.1 Xanthomonas campestris pv. campestris isolate B-1459 plasmid I, complete sequence

## Sheet: A5
Supplemental Table 5. Mapped IS elements and families in Native Xcc and Xmel genomes
Contig origin	IS Name	IS Group	IS Family	Origin	Xcc						Xmel
					Ar1BCA1	Ar1PC2	BrA1	CaNP1C	Cf3C	Cf4B1	CaNP1D	CaNP5B	CaNP6A	DMCX
Plasmid	IS1112	IS30	unknown	Xanthomonas oryzae			1		1	1
Plasmid	IS1112a	IS30	unknown	Xanthomonas oryzae						1
Plasmid	IS1403	IS3	IS407	Xanthomonas campestris			1		1	2
Plasmid	IS1404	IS3	IS407	Xanthomonas campestris			3
Plasmid	IS1478	IS5	IS5	Xanthomonas campestris	1	1	1		1	1
Plasmid	IS1479	IS5	IS5	Xanthomonas campestris		2		2
Plasmid	IS1480a	IS5	IS1031	Xanthomonas campestris	1				1	1
Plasmid	IS1480b	IS5	IS1031	Xanthomonas campestris	1		1			1
Plasmid	IS6100	IS6	unknown	Mycobacterium fortuitum										1
Plasmid	ISXac3	IS3	IS51	Xanthomonas axonopodis					1	1
Plasmid	ISXca2	IS3	IS407	Xanthomonas campestris		1		1
Plasmid	ISXfu1	IS5	IS5	Xanthomonas fuscans		1		1
Chromosome	IS1051	IS5	IS5	Xanthomonas campestris							3	8	8	3
Chromosome	IS1088	IS30	unknown	Cupriavidus necator										1
Chromosome	IS1112	IS30	unknown	Xanthomonas oryzae		2		2
Chromosome	IS1114	IS5	unknown	Xanthomonas oryzae							1	3	2
Chromosome	IS1389	IS3	IS407	Xanthomonas campestris							2			2
Chromosome	IS1389-B	IS3	IS407	Xanthomonas campestris							1	5	3	2
Chromosome	IS1394	IS30	unknown	Pseudomonas alcaligenes							1	1	1
Chromosome	IS1403	IS3	IS407	Xanthomonas campestris							1	2	1
Chromosome	IS1404	IS3	IS407	Xanthomonas campestris	32	28	14	33	31	30
Chromosome	IS1416	IS3	IS51	Burkholderia glumae										1
Chromosome	IS1478	IS5	IS5	Xanthomonas campestris	4					1			1	1
Chromosome	IS1479	IS5	IS5	Xanthomonas campestris	4	6	11	3	6	4
Chromosome	IS1480a	IS5	IS1031	Xanthomonas campestris	19	16	24	36	19	18
Chromosome	IS1480b	IS5	IS1031	Xanthomonas campestris	12	4	20	8	24	16
Chromosome	IS1481A	IS4	IS10	Xanthomonas campestris	2	4	2	1	6	4	1
Chromosome	IS1646	IS5	IS5	Xanthomonas campestris	1	4	2	2	1
Chromosome	IS401	IS3	IS51	Burkholderia cepacia							10	9	9	4
Chromosome	IS476	IS3	IS407	Xanthomonas campestris	1	1	1	1
Chromosome	ISAch1	IS5	IS5	Achromobacter sp.	1			1		1
Chromosome	ISAli4	IS3	IS51	Azospirillum lipoferum								2	1	1
Chromosome	ISAzo10	IS3	IS3	Azoarcus sp.							1	3	3
Chromosome	ISAzo23	IS5	IS1031	Azoarcus sp.							1	1	1	3
Chromosome	ISAzs24	IS3	IS51	Azospirillum sp.							1	3	4	1
Chromosome	ISAzsp1	IS3	IS51	Azotobacter sp.							4	4	4	7
Chromosome	ISBlo4	IS30	unknown	Bifidobacterium longum										4
Chromosome	ISBt3	IS3	IS51	Burkholderia thailandensis										3
Chromosome	ISCARN14	IS5	IS1031	Metagenomic data										1
Chromosome	ISGdi14	IS3	IS51	Gluconacetobacter diazotrophicus								1		1
Chromosome	ISHne1	IS3	IS51	Hyphomonas neptunium							2	3	3	2
Chromosome	ISJsp1	IS3	IS51	Janthinobacterium sp.										1
Chromosome	ISMca3	IS3	IS51	Methylococcus capsulatus								1	1	1
Chromosome	ISMca4	IS3	IS407	Methylococcus capsulatus							1	1	1
Chromosome	ISMdi26	IS5	IS1031	Methylobacterium dichloromethanicum							1			1
Chromosome	ISMex11	IS3	IS407	Methylobacterium extorquens							1
Chromosome	ISMex33	IS3	IS51	Methylobacterium extorquens								3	3
Chromosome	ISPa124	IS5	IS427	Pseudomonas aeruginosa								2	2
Chromosome	ISPssy	IS5	IS5	Pseudomonas syringae		1						1	1
Chromosome	ISPst4	IS3	IS51	Pseudomonas stutzeri									1
Chromosome	ISPst7	IS5	IS5	Pseudomonas stutzeri	1	1		1	1	1
Chromosome	ISPsy19	IS5	IS1031	Pseudomonas syringae							4	3	4	3
Chromosome	ISPsy2	IS5	IS5	Pseudomonas syringae								1	1	1
Chromosome	ISPsy45	IS5	IS5	Pseudomonas syringae							1	1	1
Chromosome	ISRso16	IS3	IS407	Ralstonia solanacearum							1
Chromosome	ISStma12	IS481	unknown	Stenotrophomonas maltophilia										1
Chromosome	ISStma13	IS3	IS407	Stenotrophomonas maltophilia	1				1
Chromosome	ISStma17	IS3	IS51	Stenotrophomonas maltophilia							2	2	1	1
Chromosome	ISStma3	IS481	unknown	Stenotrophomonas maltophilia							1	1	1	1
Chromosome	ISXac1	IS4	IS10	Xanthomonas axonopodis							2
Chromosome	ISXac2	IS3	IS407	Xanthomonas axonopodis										1
Chromosome	ISXac3	IS3	IS51	Xanthomonas axonopodis	12	25	12	11	11	13	4	4	4	1
Chromosome	ISXc6	IS5	IS5	Xanthomonas campestris	1		1		2	2
Chromosome	ISXca1	IS3	IS407	Xanthomonas campestris	1	1	1	2	1	2
Chromosome	ISXca2	IS3	IS407	Xanthomonas campestris	13	16	11	14	13	13				1
Chromosome	ISXca4	IS1595	IS1595	Xanthomonas campestris	3	6	1	6	3	3
Chromosome	ISXca5	IS5	IS5	Xanthomonas campestris							11	10	11
Chromosome	ISXci1	IS21	unknown	Xanthomonas citri							10	10	10	13
Chromosome	ISXfu1	IS5	IS5	Xanthomonas fuscans	1	1	1	1	1	1	1			1
Chromosome	ISXfu2	IS5	IS5	Xanthomonas fuscans				1
Chromosome	ISXo17	IS3	IS407	Xanthomonas oryzae								1	1
Chromosome	ISXo4	IS5	IS5	Xanthomonas oryzae							11	5	10	1
Chromosome	ISXo9	IS5	IS5	Xanthomonas oryzae							1	1
Chromosome	ISXoo4	IS5	IS5	Xanthomonas oryzae							2	2	2	1

## Sheet: A6
Supplemental Table 6. Predicted IME and ICE regions in native Xcc and Xmel isolates
Strain	Region	Start	Stop	Length	GC%	Notes
Ar1BCA1	1	1801475	1825641	24167	59.11	integrases, attL and R, traG and relaxase
Ar1PC2	1	1904391	1952046	47659	58.64	integrases, attL and R, traG and relaxase
	2	3665562	3785713	120152	63.52	integrases, attL and R, many T4SS Tra/tfc genes, 2 T2SS genes and relaxase
BrA1	1	1781538	809181	27644	58.52	integrases, attL and R, traG and relaxase
	2	3553172	3571371	18200	56.9	integrases, attL and R, traG and relaxase
	3	5112770	5120791	8022	58.41	integrases, attL and R, T4SS TrbL and relaxase
CaNP1C	1	742389	971954	229566	63.9	integrases, attL and R, many T4SS Tra/tfc genes, 2 T2SS genes and relaxase
	2	2055351	2117183	61833	57.55	integrases, attL and R, T4SS and TraG genes, and relaxase
CaNP1D	1	1915804	1933204	17401	58.62	integrases, attL and R, relaxase
CaNP5B	1	1948285	1956929	8645	58.82	integrase, attL and R, relaxase
	2	2597631	2678391	80761	63.57	attL and R, traX T4SS, integrase, relaxase
CaNP6A	1	1948285	1956929	8645	58.82	integrase, attL and R, relaxase
	2	2597631	2678391	80761	63.57	attL and R, traX T4SS, integrase, relaxase
Cf3C	1	1796731	1830102	33372	58.79	integrases, attL and R, traG and relaxase
Cf4B1	1	1931019	1968607	37589	58.41	integrases, attL and R, traG and relaxase
DMCX	none

## Sheet: A7
Supplemental Table 7. Reference strains used in this study for T3SS comparisons
Name	Strain	GI	year of isolation	isolation source	country
Xanthomonas campestris pv. campestris complete genome, strain B100	B100	AM920689.1	before 1990	SmR derivative of DSM1526 isolated from Cauliflower	Italy
Xanthomonas campestris pv. campestris str. 8004	8004	NC_007086.1	1958	Cauliflower	UK
Xanthomonas campestris pv. campestris strain 3811	3811	NZ_CP025750.1	1989	Cabbage	USA
Xanthomonas campestris pv. campestris str. CN03	CN03	NZ_CP017308.1	2002	Napa cabbage	China
Xanthomonas campestris pv. campestris strain ICMP 21080	ICMP 21080	NZ_CP012145.1	2008	Cabbage	New Zealand
Xanthomonas campestris pv. campestris strain 17	17	NZ_CP011946.1	2012	infected cruciferous plant	Taiwan
Xanthomonas campestris pv. campestris str. CFBP 1869	CFBP 1869	NZ_CM002545.1	1976	Cauliflower	Cote d'Ivoire
Xanthomonas campestris pv. campestris strain MAFF302021	MAFF302021	NZ_AP019684.1	before 1991	Cauliflower	Japan
Xanthomonas campestris pv. campestris str. ATCC 33913	ATCC 33913	NC_003902.1	1957	Brussels sprout	UK
Xanthomonas melonis strain CFBP4644	CFBP4644	NZ_MDEH00000000.1	1974	Cucumis melo	Brazil

## Sheet: A8
Supplemental Table 8. T3SS and Effector prevalence across 15 native and reference Xcc genomes
Gene	Xcc Ar1BCA1	Xcc Ar1PC2	Xcc BrA1	Xcc CaNP1C	Xcc Cf3C	Xcc Cf4B1	Xcc ATCC 33913	Xcc B100	Xcc 17	Xcc 3811	Xcc 8004	Xcc CFBP 1869	Xcc CN03	Xcc ICMP 21080	Xcc MAFF302021				1		AvrPhpE/XopAL1, AvrXccA1/AvrXca, AvrXccA2, HpaG/xopA ***, xopAM, xopAY, xopAZ, XopD
AvrBS2	1	1	1	1	1	1	1	1	1	1	1	1	1	1	1
AvrPhpE/XopAL1	1	1	1	1	1	1	1	1	1	1	1	1	1	1	1
AvrXccA1/AvrXca	1	1	1	1	1	1	1	1	1	1	1	1	1	1	1
AvrXccA2	1	1	1	1	1	1	1	1	1	1	1	1	1	1	1
Hpa4/XopF1	1	1	1	1	1	1	1	1	1	1	1	1	1	1	1
HpaA	1	1	1	1	1	1	1	1	1	1	1	1	1	1	1
HpaB	1	1	1	1	1	1	1	1	1	1	1	1	1	1	1
HpaG/xopA	1	1	1	1	1	1	1	1	1	1	1	1	1	1	1
HpaP	1	1	1	1	1	1	1	1	1	1	1	1	1	1	1
HrcC	1	1	1	1	1	1	1	1	1	1	1	1	1	1	1
HrcJ	1	1	1	1	1	1	1	1	1	1	1	1	1	1	1
HrcN	1	1	1	1	1	1	1	1	1	1	1	1	1	1	1
HrcQ	1	1	1	1	1	1	1	1	1	1	1	1	1	1	1
HrcR	1	1	1	1	1	1	1	1	1	1	1	1	1	1	1
HrcS	1	1	1	1	1	1	1	1	1	1	1	1	1	1	1
HrcT	1	1	1	1	1	1	1	1	1	1	1	1	1	1	1
HrcU	1	1	1	1	1	1	1	1	1	1	1	1	1	1	1
HrcV	1	1	1	1	1	1	1	1	1	1	1	1	1	1	1
HrpB1	1	1	1	1	1	1	1	1	1	1	1	1	1	1	1
HrpB2	1	1	1	1	1	1	1	1	1	1	1	1	1	1	1
HrpB5	1	1	1	1	1	1	1	1	1	1	1	1	1	1	1
HrpD	1	1	1	1	1	1	1	1	1	1	1	1	1	1	1
HrpE	1	1	1	1	1	1	1	1	1	1	1	1	1	1	1
HrpF	1	1	1	1	1	1	1	1	1	1	1	1	1	1	1
HrpG	1	1	1	1	1	1	1	1	1	1	1	1	1	1	1
HrpW	1	1	1	1	1	1	1	1	1	1	1	1	1	1	1
HrpX	1	1	1	1	1	1	1	1	1	1	1	1	1	1	1
xopAM	1	1	1	1	1	1	1	1	1	1	1	1	1	1	1
xopAY	1	1	1	1	1	1	1	1	1	1	1	1	1	1	1
xopAZ	1	1	1	1	1	1	1	1	1	1	1	1	1	1	1
XopD	1	1	1	1	1	1	1	1	1	1	1	1	1	1	1
xopK	1	1	1	1	1	1	1	1	1	1	1	1	1	1	1
XopL/LR	1	1	1	1	1	1	1	1	1	1	1	1	1	1	1
xopN	1	1	1	1	1	1	1	1	1	1	1	1	1	1	1
xopQ	1	1	1	1	1	1	1	1	1	1	1	1	1	1	1
xopX	1	2	1	1	1	1	1	2	1	2	1	2	2	1	1
xopZ1	1	1	1	1	1	1	1	1	1	1	1	1	1	1	1
AvrXccC/AvrXccAH/xopAH	1	1		1	1	1	1	1	1	1	1	1	1		1
AvrAC/xopAC	1		1	1	1	1	1	1		1	1	1		1	1
xopP		1	1	1			1	1	1	1	1	1	1	1	1
AvrXccB/XopJ5	1	1	1	1	1	1	1		1		1		1		1
AvrBS1	1	1		1			1	1	1		1	1	1		1
AvrBS1.1/xopH1		1		1			1	1	1	1	1	1	1		1
AvrBS3		2	1		1	1							4
AvrGf1/xopAG	1	1	1	1	1	1			1
xopR	1	1	1	1	1	1			1
AvrXccE1		1					1				1		1	1
xopM							1		1		1			1
AvrXccE3/XopE3		1		1									1
xopG2							1				1			1
HpaF		1

## Sheet: A9
Supplemental Table 9. Xcc T3 secretion and effector protein homologues detected in phylloplane associated Xanthomonas melonis genomes originating from Trinidadian isolates.
Gene	DMCX	CaNP1D	CaNP5B	CaNP6A	Xmel CFBP4644
AvrXccA1/AvrXca	1	1	1	1	1
HrpG	1	1	1	1	1
HrpX	1	1	1	1	1
xopAZ	1	1	1	1	1

## Sheet: A10
Supplemental Table 10. EffectiveDB predicted T3 effectors and SS completeness of local Xcc and Xmel strains. High and low confidence scores refer to predicted secreted proteins related to the T3SS and are compiled from multiple prediction tools built into the EffectiveDB search tool. SS completeness is used to determine the probability of a functional SS based on certain KEGG/COG categories scree…
Strain	High confidence	Low confidence	SS completeness	Functional T3SS?
Species : Xcc
Ar1BCA1	552	253	1	yes
Ar1PC2	551	269	1	yes
BrA1	573	266	1	yes
CaNP1C	558	257	1	yes
Cf3C	579	265	1	yes
Cf4B1	572	264	1	yes
Species : Xmel
CaNP1D	452	201	0.3	weak
CaNP5B	461	204	0.3	weak
CaNP6A	458	204	0.3	weak
DMCX	470	201	0.3	weak

[truncated: 1 more sheets: A11]
